# Supplementary material
Source: publisher site journal article supplement (http://www.degruyter.com/publication/journal_key/BOTM/downloadAsset/BOTM_Instructions%20for%20Authors.pdf)
Supplement: Supplementary file 1 [file BOTM_Instructions%20for%20Authors.pdf]

## I. Scope of *Botanica Marina*

*Botanica Marina* publishes high-quality contributions from all disciplines of marine botany at all levels of biological organisation from subcellular to ecosystem. The scope covers seaweeds, seagrasses, mangroves and all marine microorganisms (algae, fungi and bacteria). Key subject areas are: biogeography, physiological ecology, impacts of environmental change, taxonomy and phylogenetics, molecular biology and genetics, physiology and biochemistry, chemistry of natural products, cultivation and utilisation, and industrial processes. Research involving global or interdisciplinary interest is especially welcome. Applied science papers are appreciated, particularly when they illustrate the application of emerging conceptual issues or promote developing technologies. The journal invites state-of-the art reviews dealing with recent developments in marine botany. Assignments of chemical structures based only on comparisons of mass spectra with library data cannot be accepted. Checklists or equivalent manuscripts may be considered for publication only if they contribute new information on taxonomy (e.g., new combinations), ecology or biogeography of more than just local relevance.

## II. Editorial policy

### General processing

*Botanica Marina* publishes full-length contributions (*Research articles*), *Short communications* and *Reviews* in English only. Manuscripts are independently reviewed by peers selected by the Editors. Decisions are reached as quickly as possible. *Botanica Marina* aspires to notify authors within four weeks from submission date. Accepted papers are promptly published online ahead-of-print as soon as they have been finally processed.

### Reviewers

The authors should provide the names and e-mail addresses of up to 3 potential reviewers from at least 2 different countries. Authors may also indicate names of reviewers whom they wish to be excluded from reviewing their manuscripts.

### Publication ethics

Submission of a manuscript to *Botanica Marina* implies that the work described is not copyrighted, published or submitted elsewhere, except in abstract form. The corresponding author should ensure that all authors approve the manuscript before its submission. Authorship is restricted to those who have made a significant contribution to the conceptual design of the work, the execution of the study, data analysis or writing of the manuscript. "Honorary" authorship is strongly discouraged. See also the Publication Ethics and Malpractice Statement on the journal's website. *Botanica Marina* strongly disapproves of plagiarism and related issues. The Editors reserve the right to reject without reviewing manuscripts with high plagiarism content, or manuscripts that clearly appear to belong to a sequence of very similar works that add no or little scientific value.

### Copyright

Manuscripts are accepted on condition of transfer of copyright (for U.S. government employees: to the extent transferable) to *Botanica Marina*. Once the manuscript is accepted, it may not be published elsewhere without the consent of the copyright holders.

## III. Submission of manuscripts

Manuscripts must be submitted online at:  
<https://mc.manuscriptcentral.com/botmar>

## IV. Preparation of manuscripts

### Cover letter

Each manuscript must be accompanied by a cover letter briefly commenting on the novelty/originality of the article. Scientific originality should be demonstrated by a contribution to knowledge beyond a straightforward confirmation of what has already been shown.

### Language

Manuscripts should be written in clear and concise English. The text must be carefully checked for grammatical and typing errors. Non-native speakers are requested to have their text proofread by a native English speaker prior to submission.

### General format and length

Formatting should be kept to a minimum. Do not create headers or footers, page breaks or arrange your text with the space key. Include page numbers. Please avoid footnotes in the text, use parentheses instead. Use upper and lower case letters for headings and names. Do not write names in capitals. Do not use the ampersand (&) between names (with the exception of company names). Manuscripts should be prepared in 12-point font size, double-spaced throughout, with a left-hand margin of 4 cm and a right-hand margin of 2 cm in A4 or American letter-sized documents. Do not right justify the text.

**Research articles:** Maximum length: 20,000 words (authors are requested to list the word count on the title page); maximum total of tables/figures/schemes: 15. Additional online only supplementary material is unrestricted but should contribute to the main article in a reasonable way.

**Short communications:** Maximum length: 2,500 words (authors need to pls. list the word count on the title page); maximum total of tables/figures/schemes: 3. Additional online only supplementary material may be added but should be kept to a minimum.

**Reviews** and taxonomic revisions based upon high specimen numbers or covering wide geographical areas are exempted from length restrictions provided the topic justifies this.

### Font marking / dimensions and units

*Italics* are used for Latin names and phrases (though not for standard abbreviations like et al., i.e., ca., vs.), names of periodicals and volume numbers, titles of books in references and certain parts of chemical formulas.

SMALL CAPITALS are used for M (molar) or N (normal).

The metric system must be used (with the exception of nautical mile = one minute of latitude). SI units are required. Compound units are given with the proper exponent without a point (period), e.g., gO<sub>2</sub> g<sup>-1</sup>dw h<sup>-1</sup>. Salinity has no units.

### Nomenclature

Authors are asked to follow the recommendations of the CBE Style Manual (Council of Biological Editors, Committee on Form and Style, American Institute of Biological Sciences, Washington, D.C., U.S.A.). The recommendations of the

- International Union of Pure and Applied Chemistry (IUPAC),
- International Union of Biochemistry (IUB),
- International Code of Botanical Nomenclature,
- Système International d'Unités (SI),
- American National Standard for the Abbreviation of Titles of Periodicals,
- World List of Scientific Periodicals are binding.

### Research ethics and best practice

The authors must describe safeguards to meet standards of ethical conduct of research (e.g., approval of research protocols by institutional committees).

Each voucher specimen described or mentioned must have been deposited in an appropriate institution and bear a catalogue number. DNA sequences associated with the article must be deposited in molecular data banks (GenBank, EMBL, DDBJ). If possible, original data used in the manuscript should be deposited in an appropriate repository in a free access format.

### Manuscript structure

**Structure of *Research articles*:** Title page, abstract (max. 200 words), keywords (max. 5), main text, acknowledgements (if applicable), author contributions, research funding, conflict of interest statement, compliance with ethical standards, references list, figure captions. All

section headings of the main textbody must be numbered consecutively. Abbreviations should be explained at first mention in the textbody, thereafter the abbreviations should be used only.

**Title page:** The title page should contain the total word count, a concise title, the name(s) of all author(s), the complete postal address(es), e-mail addresses and a short title of maximum 50 characters.

**Abstract:** The content of the title must not be repeated. Do not give authorities for species/genus names in the abstract. Begin the abstract by stating the scientific question of concern. Explain the methods used to tackle the question. The results should be outlined briefly and put into a concise broad perspective.

**Introduction:** The introduction must define the problem within the context of existing knowledge. Ensure that those not working in your particular field are able to understand the objectives of the work.

**Materials and methods:** Be as concise as possible, but with sufficient detail to enable others to repeat your work. All Latin binominals should have the correct authorities quoted at their first citation (but not in the abstract) or at some convenient point such as a list of species. Authors should check with AlgaeBase that the species names they use are up-to-date and currently accepted.

**Results:** Only material pertinent to the subject may be included. Data must not be repeated in figures and tables.

**Discussion and conclusion:** This part should interpret the results in relation to the problem outlined in the Introduction. The discussion should place the results within the context of the broad scientific discipline of the study. A conclusion should be added if results and discussion are combined.

**Acknowledgements:** This section is reserved for recognizing people or institutions in general.

**Author contributions:** The contribution of each author to the study should be given in detail.

**Research funding:** Financial sources that supported the research need to be listed.

**Conflict of interest statement:** The author(s) need to declare whether or not they have any conflicts of interest regarding their article.

**Compliance with ethical standards:** In this section, authors have to refer to approving agency, license number (if available), formal permission from the relevant authority, or just a statement that the procedures are/were in accordance with the national laws.

**Graphical abstract:** Authors should select a non-copyrighted image (300 dpi resolution) for this abstract, and provide a one-sentence summary of their work (max. 40 words). Both items should be uploaded online together with the final manuscript.

**Author bionotes:** Authors should provide a passport-type photograph (300 dpi resolution) and a brief academic biography (max. 80 words) for each author. Both items should be uploaded online together with the final manuscript. For articles with more than five authors, bionotes are restricted to five.

**Structure of Short communications:** Title page incl. word count, abstract (max. 100 words), keywords (max. 5), a single section of main text without headings, and, as in full-length papers: acknowledgements (if applicable), author contributions, research funding, conflict of interest statement, compliance with ethical standards, references list, figure captions, graphical abstract, author bionotes. Experimental procedures should be described in legends to figures or legends to tables.

**Structure of Reviews:** Title page, abstract (max. 200 words), keywords (max. 5), main text, acknowledgements (if applicable), author contributions, research funding, conflict of interest statement, compliance with ethical standards, references list, figure captions. All section headings of the main text body must be numbered consecutively. Abbreviations should be explained at first mention in the text body; thereafter the abbreviations should be used only.

## References

The journal uses **Harvard style**. Please apply the rules as outlined in the **reference style sheet at the end of this document**. Thank you.

## Tables

Submit tables on separate pages and number them consecutively using Arabic numerals. Provide a short descriptive title, column headings, and (if necessary) footnotes to make each table self-explanatory. Refer to tables in the text as Table 1, etc. Use Table 1, etc. in the table legends. File formats: WORD, Excel.

## Figures

**General requirements:** All illustrations must be of reproduction-ready quality. They will be reduced in size to fit, whenever possible, the width of a single column. Lettering of all figures within the article should be uniform in style (preferably a sans serif typeface like Helvetica) and of sufficient size (ca. 8 pt.). Uppercase letters A, B, C, etc. should be used to identify parts of multi-part figures. Cite all figures in the text in the sequence in which they are first mentioned in the text. Do not embed figures within the text body of the manuscript; submit figures in separate files. File formats: jpg, tif, eps.

**Halftone figures (grayscale and color)** should have a minimum resolution of 300 dpi and be of good contrast. Authors are encouraged to submit illustrations in color if necessary for their scientific content. Publication of color figures is provided free of charge in both online and print editions.

**Line drawings** must be of reproduction-ready quality. Please note that faint shading may be lost upon reproduction. When drawing bar graphs, use patterning instead of grayscales. Lettering of all figures should be uniform in style. A resolution of 1200 dpi is recommended.

**Figure legends:** Provide a legend to make each figure self-explanatory. Explain all symbols used in the figures. Define abbreviations at first use in each legend.

## Use of third-party material/copyright permissions

It is the authors' responsibility to obtain permission to reproduce original or modified material that has been previously published. Copyright permissions can be obtained through the Copyright Clearance Center ([www.copyright.com](http://www.copyright.com)).

## V. Proofing and publication

### Proof for correction

Authors of accepted papers will receive a proof for correction. At proof stage, only minor changes other than corrections of printers' errors are allowed. As per De Gruyter policy, no author list changes are permitted after acceptance of an article. The De Gruyter production team is instructed to enforce this policy during the production/proofing process.

### Open access publication

De Gruyter offers open access publication (<https://www.degruyter.com/cms/pages/open-access>). At proof stage, authors are informed about this option.

### Electronic offprints

The electronic files of typeset articles in Adobe Acrobat PDF format are provided free of charge; corresponding authors receive the notification that their article has been published online.

### Note for authors of NIH-funded research

De Gruyter acknowledges that the author of a US-agency-funded article retains the right to provide a copy of the final manuscript to agency upon acceptance for publication or thereafter, for public archiving in PubMed Central 12 months after publication in *Botanica Marina*. Note that only the accepted author's version of the manuscript, not the PDF file of the published article, may be used for NIH archiving.

### Contact Editorial Office *Botanica Marina*:

De Gruyter, Genthiner Str. 13, 10785 Berlin, Germany

Tel. +49-30-26005-279

E-mail: [bot.mar.editorial@degruyter.com](mailto:bot.mar.editorial@degruyter.com)

<https://www.degruyter.com/bm>

## Harvard Reference Style

| In-text citation                                                 |                                                                                                                                                                                                                                                                                         |                                                                               |
|------------------------------------------------------------------|-----------------------------------------------------------------------------------------------------------------------------------------------------------------------------------------------------------------------------------------------------------------------------------------|-------------------------------------------------------------------------------|
|                                                                  | Direct citation                                                                                                                                                                                                                                                                         | Indirect citation                                                             |
| Single author                                                    | Paccagnella (2015)                                                                                                                                                                                                                                                                      | (Paccagnella 2015)                                                            |
| Two authors                                                      | Borgonovi and Burns (2015)                                                                                                                                                                                                                                                              | (Borgonovi and Burns 2015)                                                    |
| More than two authors                                            | Martin et al. (2014)                                                                                                                                                                                                                                                                    | (Martin et al. 2014)                                                          |
| Series of references                                             | Zabal et al. (2014) and Mohadjer et al. (2013a)                                                                                                                                                                                                                                         | <b>Alphabetical order</b><br>(Mohadjer et al. 2013a; Zabal et al. 2014).      |
| Same author group with different years                           | Smith et al. (1985, 1986)                                                                                                                                                                                                                                                               | (Smith et al. 1985, 1986)                                                     |
| Same author group with same year                                 | Lawrence and David (2009a,b)                                                                                                                                                                                                                                                            | (Lawrence and David 2009a,b)                                                  |
| Author (with same surname and different initials) with same year | T.H.E. Smith et al. (2003) and A. Smith et al. (2003)                                                                                                                                                                                                                                   | <b>Alphabetical order</b><br>(A. Smith et al. 2003; T.H.E. Smith et al. 2003) |
| Journal titles                                                   | Abbreviated with end period/Roman                                                                                                                                                                                                                                                       |                                                                               |
| Issue number                                                     | Not allowed                                                                                                                                                                                                                                                                             |                                                                               |
| Punctuation b/w journal title and volume                         | Only space                                                                                                                                                                                                                                                                              |                                                                               |
| Reference list                                                   |                                                                                                                                                                                                                                                                                         |                                                                               |
| Reference type                                                   | Example                                                                                                                                                                                                                                                                                 |                                                                               |
| Reference list order                                             | Alphabetical order                                                                                                                                                                                                                                                                      |                                                                               |
| 1. Journal                                                       | Melitz, M.J. (2003). The impact of trade on intra-industry reallocations and aggregate industry productivity. <i>Econometrica</i> 71: 1695–1725.                                                                                                                                        |                                                                               |
| 2. Journal with supplement                                       | Yuan, M. and Liu, H. (2011). The economic consequences of fair value accounting. <i>Account. Econ. Law</i> 1(Suppl. 2): 1–42.                                                                                                                                                           |                                                                               |
| 3. Collaboration                                                 | Institute of Chartered Accountants in Australia (2004). <i>AASB standards for 2005: equivalents to IFRSs as at August 2004</i> , Person Education, Sydney, Australia.                                                                                                                   |                                                                               |
| 4. et al. usage (more than ten authors followed by et al.)       | Kaye, K., Day, R.D., Hair, E.C., Moore, K.A., Hadley, A.M., Teixeira, P.J., Helmschrott, S., Massing, N., Ackermann, D., Yuan, M. et al. (2009). Parent marital quality and the parent-adolescent relationship: effects on sexual activity among adolescents and youth. <i>Marriage</i> |                                                                               |

|                                           |                                                                                                                                                                                                                                                                                                                                                          |
|-------------------------------------------|----------------------------------------------------------------------------------------------------------------------------------------------------------------------------------------------------------------------------------------------------------------------------------------------------------------------------------------------------------|
|                                           | & Fam. Rev. 45: 270–288.                                                                                                                                                                                                                                                                                                                                 |
| 5. Epub ahead of print                    | Mason, E.B., Burkhart, K., and Lazebnik, R. (2018). Adolescent stress management in a primary care clinic. <i>Journal of Pediatric Health Care</i> , DOI: 10.1016/j.pedhc.2018.08.001 (Epub ahead of print).                                                                                                                                             |
| 6. Reference – in press                   | Tappy, L. and Lara, K.A. (in press). Metabolic effects of fructose and the worldwide increase in obesity. <i>Physiol. Rev.</i>                                                                                                                                                                                                                           |
| 7. Book/monograph                         | Andreasen, N.C. (2001). <i>Brave new brain: conquering mental illness in the era of the genome</i> . Oxford University Press, Oxford.                                                                                                                                                                                                                    |
| 8. Book with edition                      | Hicks, J.R. (1946). <i>Value and capital</i> , 2nd ed. Oxford: Clarendon.                                                                                                                                                                                                                                                                                |
| 9. Edited book                            | Hertel, T.W. (Ed.) (1997). <i>Global trade analysis: modeling and applications</i> . Western Sydney University, Penrith.                                                                                                                                                                                                                                 |
| 10. Edited book with chapter title        | Ferres, K. (2001). Idiot box: television, urban myths and ethical scenarios. In: Craven, I. (Ed.). <i>Australian cinema in the 1990s</i> . Frank Cass, London, pp. 175–188.                                                                                                                                                                              |
| 11. Edited book series                    | Langacker, R.W. (2004). Possession, location, and existence. In: Augusto S. and Gonçalves, M. (Eds.), <i>Linguagem, cultura e cognição: Estudos de linguística cognitiva</i> , Vol. I. Almedina, Coimbra, pp. 85–120.                                                                                                                                    |
| 12. Proceedings/Conferences               | Chang, S.S., Liaw, L., and Ruppenhofer, J. (Eds.) (2000). <i>Proceedings of the twenty-fifth annual meeting of the Berkeley Linguistics Society, February 12-15, 1999: general session and parasession on loan word phenomena</i> . Berkeley Linguistics Soc., Berkeley.                                                                                 |
| 13. Electronic publication (Available at) | Cooper, D. (2009). Native ant may stop toad in its tracks. ABC Science, Available at: < <a href="http://www.abc.net.au/science/articles/2009/03/31/2530686.htm?site=science&amp;topic=la+test">http://www.abc.net.au/science/articles/2009/03/31/2530686.htm?site=science&amp;topic=la+test</a> >.                                                       |
| 14. Electronic publication (Accessed)     | Este, J., Warren, C., Connor, L., Brown, M., Pollard, R., and O'Connor, T. (2008). Life in the clickstream: the future of journalism. Media Entertainment and Arts Alliance, Available at: < <a href="http://www.alliance.org.au/documents/foj_report_final.pdf">http://www.alliance.org.au/documents/foj_report_final.pdf</a> > (Accessed 27 May 2009). |
| 15. Thesis/Dissertation                   | Fayadh, K.H. (2015). <i>The legal regulation of assisted reproductive technology in Iraq: lessons from the Australian approach</i> , Ph.D. thesis. Penrith, Western Sydney University.                                                                                                                                                                   |
| 16. Report                                | Pataki, Z. (2014). The cost of non-Europe in the single market. Technical Report 9051, European Parliamentary Research Service.                                                                                                                                                                                                                          |
| 17. Patent                                | Smith, P.S. (2002). A pump for use in windmill assembly, application no. 2008230011.                                                                                                                                                                                                                                                                     |
| 18. Standards                             | Standards Australia (1989). <i>Electrical equipment for coal mines – insulating materials – materials for insulating power conducting components</i> (AS 1147.1-1989).                                                                                                                                                                                   |
